# Supplementary material
Source: MDPI journal article supplement (https://www.mdpi.com/2071-1050/14/9/4927)
Supplement: s1 [file s1]

### Supplementary Material: References Supporting Identified Drivers, Barriers, and Enablers in Tables 1–3

- Aid, G., Eklund, M., Anderberg, S., Baas, L., 2017. Expanding roles for the Swedish waste management sector in inter-organizational resource management. *Resources, Conservation and Recycling* 124, 85–97. <https://doi.org/10.1016/j.resconrec.2017.04.007>
- Bacudio, L.R., Benjamin, M.F.D., Eusebio, R.C.P., Holaysan, S.A.K., Promentilla, M.A.B., Yu, K.D.S., Aviso, K.B., 2016. Analyzing barriers to implementing industrial symbiosis networks using DEMATEL. *Sustainable Production and Consumption* 7, 57–65. <http://dx.doi.org/10.1016/j.spc.2016.03.001>
- Branca TA, Colla V, Algermissen D, Granbom H, Martini U, Morillon A, et al. Reuse and Recycling of By-Products in the Steel Sector: Recent Achievements Paving the Way to Circular Economy and Industrial Symbiosis in Europe. *Metals*. 2020;10(3) <https://doi.org/10.3390/met10030345>
- Ceglia, D., de Abreu, M.C.S., Da Silva, J.C.L., 2017. Critical elements for eco-retrofitting a conventional industrial park: Social barriers to be overcome. *Journal of Environmental Management* 187, 375–383. <http://dx.doi.org/10.1016/j.jenvman.2016.10.064>
- Cervo, H., Ogé, S., Maqbool, A.S., Alva, F.M., Lessard, L., Bredimas, A., Ferrasse, J.H., Eetvelde, G.V., 2019. A case study of industrial symbiosis in the humber region using the EPOS methodology. *Sustainability (Switzerland)* 11(24). <https://doi.org/10.3390/su11246940>
- Colpo I, Funck VM, Martins MES. Waste Management in Craft Beer Production: Study of Industrial Symbiosis in the Southern Brazilian Context. *ENVIRONMENTAL ENGINEERING SCIENCE*. 2021. <http://doi.org/10.1089/ees.2021.0193>
- Costa, I., Ferrão, P., 2010. A case study of industrial symbiosis development using a middle-out approach. *Journal of Cleaner Production* 18(10–11), 984–992. <https://doi.org/10.1016/j.jclepro.2010.03.007>
- Cui, H., Liu, C., Côté, R., Liu, W., 2018. Understanding the evolution of industrial symbiosis with a system dynamics model: A case study of Hai Hua Industrial Symbiosis, China. *Sustainability (Switzerland)* 10(11). <https://doi.org/10.3390/su10113873>
- Domenech, T., Bleischwitz, R., Doranova, A., Panayotopoulos, D., Roman, L., 2019. Mapping Industrial Symbiosis Development in Europe\_ typologies of networks, characteristics, performance and contribution to the Circular Economy. *Resources, Conservation and Recycling* 141, 76–98. <https://doi.org/10.1016/j.resconrec.2018.09.016>
- Dong, L., Fujita, T., Dai, M., Geng, Y., Ren, J., Fujii, M., Wang, Y., Ohnishi, S., 2016. Towards preventative eco-industrial development: An industrial and urban symbiosis case in one typical industrial city in China. *Journal of Cleaner Production* 114, 387–400. <http://dx.doi.org/10.1016/j.jclepro.2015.05.015>
- Falsafi M, Fornasiero R. Explorative Multiple-Case Research on the Scrap-Based Steel Slag Value Chain: Opportunities for Circular Economy. *Sustainability (Switzerland)*. 2022;14(4). <https://doi.org/10.3390/su14042284>
- Gibbs, D., Deutz, P., 2005. Implementing industrial ecology? Planning for eco-industrial parks in the USA. *Geoforum* 36(4), 452–464. <https://doi.org/10.1016/j.geoforum.2004.07.009>
- Giurco, D., Bossilkov, A., Patterson, J., Kazaglis, A., 2011. Developing industrial water reuse synergies in Port Melbourne: Cost effectiveness, barriers and opportunities. *Journal of Cleaner Production* 19(8), 867–876. <https://doi.org/10.1016/j.jclepro.2010.07.001>

- Golev, A., Corder, G.D., Giurco, D.P., 2015. Barriers to Industrial Symbiosis: Insights from the Use of a Maturity Grid. *Journal of Industrial Ecology* 19(1), 141–153. <http://dx.doi.org/10.1111/jiec.12159>
- Heeres, R.R., Vermeulen, W.J.V., De Walle, F.B., 2004. Eco-industrial park initiatives in the USA and the Netherlands: First lessons. *Journal of Cleaner Production* 12(8–10), 985–995. <https://doi.org/10.1016/j.jclepro.2004.02.014>
- Hu, W., Tian, J., Li, X., Chen, L., 2020. Wastewater treatment system optimization with an industrial symbiosis model: A case study of a Chinese eco-industrial park. *Journal of Industrial Ecology* 24(6), 1338–1351. <https://doi.org/10.1111/jiec.13020>
- Iacondini, A., Mencherini, U., Passarini, F., Vassura, I., Fanelli, A., Cibotti, P., 2015. Feasibility of Industrial Symbiosis in Italy as an Opportunity for Economic Development: Critical Success Factor Analysis, Impact and Constrains of the Specific Italian Regulations. *Waste and Biomass Valorization* 6(5), 865–874. <https://link.springer.com/article/10.1007/s12649-015-9380-5>
- Ji, Y., Liu, Z., Wu, J., He, Y., Xu, H., 2020. Which factors promote or inhibit enterprises' participation in industrial symbiosis? An analytical approach and a case study in China. *Journal of Cleaner Production* 244. <https://doi.org/10.1016/j.jclepro.2019.118600>
- Liu, C., Côté, R.P., Zhang, K., 2015. Implementing a three-level approach in industrial symbiosis. *Journal of Cleaner Production* 87(1), 318–327. <http://dx.doi.org/10.1016/j.jclepro.2014.09.067>
- Liu K, Wang X, Yan Y. Network Analysis of Industrial Symbiosis in Chemical Industrial Parks: A Case Study of Nanjing Jiangbei New Materials High-Tech Park. *Sustainability (Switzerland)*. 2022;14(3). <https://doi.org/10.3390/su14031381>
- Lybaek, R., Christensen, T.B., Thomsen, T.P., 2021. Enhancing policies for deployment of Industrial symbiosis-What are the obstacles, drivers and future way forward? *Journal of Cleaner Production* 280. <https://doi.org/10.1016/j.jclepro.2020.124351>
- Madsen, J.K., Boisen, N., Nielsen, L.U., Tackmann, L.H., 2015. Industrial Symbiosis Exchanges: Developing a Guideline to Companies. *Waste and Biomass Valorization* 6(5), 855–864. [https://www.infona.pl/resource/bwmeta1.element.springer-doi-10\\_1007-S12649-015-9417-9](https://www.infona.pl/resource/bwmeta1.element.springer-doi-10_1007-S12649-015-9417-9)
- Mainar-Toledo MD, Castan MA, Millán G, Rodin V, Kollmann A, Peccianti F, et al. Accelerating sustainable and economic development via industrial energy cooperation and shared services—A case study for three European countries. *Renewable and Sustainable Energy Reviews*. 2022;153. <https://doi.org/10.1016/j.rser.2021.111737>
- Mathews, J.A., Tan, H., 2011. Progress toward a circular economy in China: The drivers (and inhibitors) of eco-industrial initiative. *Journal of Industrial Ecology* 15(3), 435–457. <https://doi.org/10.1111/j.1530-9290.2011.00332.x>
- Mauthoor, S., 2017. Uncovering industrial symbiosis potentials in a small island developing state: The case study of Mauritius. *Journal of Cleaner Production* 147, 506–513. <http://dx.doi.org/10.1016/j.jclepro.2017.01.138>
- Mirata, M., 2004. Experiences from early stages of a national industrial symbiosis programme in the UK: Determinants and coordination challenges. *Journal of Cleaner Production* 12(8–10), 967–983. <https://doi.org/10.1016/j.jclepro.2004.02.031>
- Morales, M.E., Diemer, A., 2019. Industrial symbiosis dynamics, a strategy to accomplish complex analysis: The Dunkirk case study. *Sustainability (Switzerland)* 11(7). <https://doi.org/10.3390/su11071971>
- Moser, S., Rodin, V., 2021. The 'Industrial Symbiosis Gap': Information asymmetries are the main challenge for industrial symbiosis—evidence from four Austrian testbeds with a focus on heat exchange. *Elektrotechnik und Informationstechnik* 138(4–5), 264–268. <https://doi.org/10.1007/s00502-021-00897-y>

- Noori, S., Korevaar, G., Ramirez, A.R., 2020. Institutional lens upon industrial symbiosis dynamics: The case of Persian gulf mining and metal industries special economic zone. *Sustainability* (Switzerland) 12(15). <https://doi.org/10.3390/su12156192>
- Pajunen, N., Watkins, G., Husgafvel, R., Heiskanen, K., Dahl, O., 2013. The challenge to overcome institutional barriers in the development of industrial residue based novel symbiosis products-Experiences from Finnish process industry. *Minerals Engineering* 46–47, 144–156. <http://dx.doi.org/10.1016/j.mineng.2013.03.008>
- Patricio, J., Axelsson, L., Biome, S., Rosado, L., 2018. Enabling industrial symbiosis collaborations between SMEs from a regional perspective. *Journal of Cleaner Production* 202, 1120–1130. <https://doi.org/10.1016/j.jclepro.2018.07.230>
- Pizzi S, Leopizzi R, Caputo A. The enablers in the relationship between entrepreneurial ecosystems and the circular economy: The case of circularity.com. *Management of Environmental Quality: An International Journal*. 2022;33(1):26–43. <https://doi.org/10.1108/MEQ-01-2021-0011>
- Prosman, E.J., Wæhrens, B.V., Liotta, G., 2017. Closing Global Material Loops: Initial Insights into Firm-Level Challenges. *Journal of Industrial Ecology* 21(3), 641–650. <http://dx.doi.org/10.1111/jiec.12535>
- Päivärinne, S., Hjelm, O., Gustafsson, S., 2015. Excess heat supply collaborations within the district heating sector: Drivers and barriers. *Journal of Renewable and Sustainable Energy* 7(3). <https://doi.org/10.1063/1.4921759>
- Rodin, V., Moser, S., 2021. The perfect match? 100 reasons why energy cooperation is not realized in industrial parks. *Energy Research and Social Science* 74. <https://doi.org/10.1016/j.erss.2021.101964>
- Rweyendela, A.G., Mwegoha, W.J.S., 2020. Industrial symbiosis in Tanzania: A case study from the sugar industry. *African Journal of Science, Technology, Innovation and Development*, 1–12. <https://doi.org/10.1080/20421338.2020.1773605>
- Sakr, D., Baas, L., El-Haggar, S., Huisinigh, D., 2011. Critical success and limiting factors for eco-industrial parks: Global trends and Egyptian context. *Journal of Cleaner Production* 19(11), 1158–1169. <https://doi.org/10.1016/j.jclepro.2011.01.001>
- Salmi, O., Hukkinen, J., Heino, J., Pajunen, N., Wierink, M., 2012. Governing the Interplay between Industrial Ecosystems and Environmental Regulation: Heavy Industries in the Gulf of Bothnia in Finland and Sweden. *Journal of Industrial Ecology* 16(1), 119–128. <http://dx.doi.org/10.1111/j.1530-9290.2011.00403.x>
- Sellitto, M.A., Murakami, F.K., Butturi, M.A., Marinelli, S., Kadel, N., Rimini, B., 2021. Barriers, drivers, and relationships in industrial symbiosis of a network of Brazilian manufacturing companies. *Sustainable Production and Consumption* 26, 443–454. <https://doi.org/10.1016/j.spc.2020.09.016>
- Sharib, S., Halog, A., 2017. Enhancing value chains by applying industrial symbiosis concept to the Rubber City in Kedah, Malaysia. *Journal of Cleaner Production* 141, 1095–1108. <https://doi.org/10.1016/j.jclepro.2016.09.089>
- Short, S.W., Bocken, N.M.P., Barlow, C.Y., Chertow, M.R., 2014. From refining sugar to growing tomatoes: Industrial ecology and business model evolution. *Journal of Industrial Ecology* 18(5), 603–618. <https://doi.org/10.1111/jiec.12171>
- Siskos, I., Van Wassenhove, L.N., 2017. Synergy Management Services Companies: A New Business Model for Industrial Park Operators. *Journal of Industrial Ecology* 21(4), 802–814. <https://doi.org/10.1111/jiec.12472>
- Steenmans K. Do property rights in waste and by-products matter for promoting reuse, recycling and recovery? Lessons learnt from northwestern Europe. *Current Research in Environmental Sustainability*. 2021;3. <https://doi.org/10.1016/j.crsust.2021.100030>
- Taddeo, R., Simboli, A., Morgante, A., 2012. Implementing eco-industrial parks in existing clusters. Findings from a historical Italian chemical site. *Journal of Cleaner Production* 33, 22–29. <https://doi.org/10.1016/j.jclepro.2012.05.011>

- van Beers, D., Bossilkov, A., Lund, C., 2009. Development of large scale reuses of inorganic by-products in Australia: The case study of Kwinana, Western Australia. *Resources Conservation and Recycling* 53(7), 365–378. <https://doi.org/10.1016/j.resconrec.2009.02.006>
- van Beers, D., Corder, G., Bossilkov, A., van Berkel, R., 2007. Industrial symbiosis in the Australian minerals industry-The cases of Kwinana and Gladstone. *Journal of Industrial Ecology* 11(1), 55–72. <https://doi.org/10.1162/jiec.2007.1161>
- Watkins, G., Husgafvel, R., Pajunen, N., Dahl, O., Heiskanen, K., 2013. Overcoming institutional barriers in the development of novel process industry residue based symbiosis products-Case study at the EU level. *Minerals Engineering* 41, 31–40. <http://dx.doi.org/10.1016/j.mineng.2012.10.003>
- Wu, J.N.A., Qi, H., Wang, R.Q., 2016. Insight into industrial symbiosis and carbon metabolism from the evolution of iron and steel industrial network. *Journal of Cleaner Production* 135, 251–262. <http://dx.doi.org/10.1016/j.jclepro.2016.06.103>
- Yedla, S., Park, H.S., 2017. Eco-industrial networking for sustainable development: Review of issues and development strategies. *Clean Technologies and Environmental Policy* 19(2), 391–402. <https://doi.org/10.1007/s10098-016-1224-x>
- Yu, F., Han, F., Cui, Z., 2015. Evolution of industrial symbiosis in an eco-industrial park in China. *Journal of Cleaner Production* 87, 339–347. <https://doi.org/10.1016/j.jclepro.2014.10.058>
- Yu, C., De Jong, M., Dijkema, G.P.J., 2014. Process analysis of eco-industrial park development-The case of Tianjin, China. *Journal of Cleaner Production* 64, 464–477. <http://dx.doi.org/10.1016/j.jclepro.2013.09.002>
- Zhu, Q., Lowe, E.A., Wei, Y.A., Barnes, D., 2007. Industrial symbiosis in China: A case study of the Guitang Group. *Journal of Industrial Ecology* 11(1), 31–42. <https://doi.org/10.1162/jiec.2007.929>
- Zhu, Q., Cote, R.P., 2004. Integrating green supply chain management into an embryonic eco-industrial development: A case study of the Guitang Group. *Journal of Cleaner Production* 12(8–10), 1025–1035. <https://doi.org/10.1016/j.jclepro.2004.02.030>
