# Supplementary material
Source: MDPI journal article supplement (https://www.mdpi.com/2071-1050/14/9/4927)
Supplement: s1 [file s1]

Archive with 2 entries (2 files):
- sustainability-1648995-supplementary-done proof.pdf
- sustainability-1648995-supplementary.pdf
